# Supplementary material for: Serum magnesium and the risk of prediabetes: a population-based cohort study
Source: PubMed Central journal article supplement (PMC6518103; doi:10.1007/s00125-017-4224-4), 2017-02-21
Supplement: 125_2017_4224_MOESM1_ESM.pdf [file 125_2017_4224_MOESM1_ESM.pdf]

**ESM Table 1** Minor allele frequency distribution among diabetes cases and controls, among selected Single Nucleotide Polymorphisms in magnesium regulating genes.

|                |         |               |                        |                    | Minor Allele Frequency |          |
|----------------|---------|---------------|------------------------|--------------------|------------------------|----------|
| Locus          | SNP     | Location      | Functional consequence | Major/Minor Allele | Cases                  | Controls |
| <i>CLDN16</i>  | 9990270 | Chromosome 3  | Non-encoding region    | G/C                | 0.43                   | 0.45     |
| <i>CLDN19</i>  | 719676  | Chromosome 1  | Intron                 | A/G                | 0.22                   | 0.25     |
| <i>CNNM1</i>   | 6584273 | Chromosome 10 | Intron                 | G/A                | 0.03                   | 0.03     |
| <i>CNNM2</i>   | 3740393 | Chromosome 10 | Intron                 | G/C                | 0.13                   | 0.14     |
| <i>FXVD2</i>   | 948100  | Chromosome 11 | Intron                 | C/G                | 0.10                   | 0.11     |
| <i>KCNJ11</i>  | 1800467 | Chromosome 11 | Intron                 | G/C                | 0.03                   | 0.03     |
| <i>MRS2</i>    | 7738943 | Chromosome 6  | Intron                 | G/C                | 0.07                   | 0.06     |
| <i>SCL41A1</i> | 823154  | Chromosome 1  | Intron                 | C/T                | 0.39                   | 0.41     |
| <i>SCL41A2</i> | 2463021 | Chromosome 12 | Non-encoding region    | A/T                | 0.10                   | 0.09     |
| <i>TRPM6</i>   | 2274924 | Chromosome 9  | Missense               | T/C                | 0.16                   | 0.17     |
| <i>TRPM7</i>   | 8042919 | Chromosome 15 | Missense               | G/A                | 0.11                   | 0.10     |

refSNP numbers, location, functional consequence and major allele was obtained from the Single Nucleotide Polymorphism Database (dbSNP).
